# Supplementary material for: The role of Imp and Syp RNA-binding proteins in precise neuronal elimination by apoptosis through the regulation of transcription factors
Source: eLife journal article supplement (doi:10.7554/elife.91634), 2023-10-11
Supplement: fig7-data1 [file elife-91634-fig7-data1-v1.zip]

## Sheet: Feuil1
Syp					Imp					Sorted for distance		Syp mean	Imp mean	Syp/Imp	Imp/Syp	helper
1	10.729	3	23		1	6.049	0	20		10	44.3898	0.956	8.126	0.117647	8.5	1
2	11.052	2	30		2	6.376	0	19		8	35.848	0.643	9.813	0.0655253	15.2613	2
3	12.091	1	28		3	3.701	0	13		26	34.8091	0.737	10.028	0.0734942	13.6065	3
4	10.238	3	24		4	4.23	0	17		32	32.1159	0.812	9.324	0.0870871	11.4828	4
5	18.564	5	40		5	2.056	0	9		33	30.7443	0.798	12.099	0.0659559	15.1617	5
6	18.63	2	43		6	2.468	0	12		34	30.019	0.675	7.892	0.0855297	11.6919	6
7	16.368	5	39		7	1.451	0	6		21	28.7712	0.691	8.266	0.0835955	11.9624	7
8	14.963	3	43		8	2.275	0	11		12	25.8738	0.586	9.798	0.0598081	16.7201	8
9	11.993	2	30		9	2.998	0	15		28	25.695	0.67	9.635	0.0695381	14.3806	9
10	15.681	4	36		10	1.513	0	6		25	21.3754	0.764	9.709	0.0786899	12.7081	10
11	9.695	2	24		11	3.444	0	15		27	20.576	0.939	9.816	0.0956601	10.4537	11
12	11.531	1	33		12	3.236	0	13		16	18.6721	1.583	13.148	0.120399	8.30575	12
13	12.018	1	39		13	2.068	0	14		31	16.0692	2.744	13.579	0.202077	4.94862	13
14	8.738	0	32		14	2.863	0	14		19	15.7102	4.83	4.9	0.985714	1.01449	14
15	7.251	1	14		15	8.675	0	27		29	15.6876	6.01	3.922	1.53238	0.652579	15
16	8.04	1	25		16	7.107	0	27		15	12.7223	2.074	10.662	0.194523	5.14079	16
17	4.586	0	15		17	7.764	0	29		18	12.3274	2.684	10.911	0.24599	4.0652	17
18	2.684	0	11		18	10.911	1	31		23	11.6608	4.586	7.764	0.590675	1.69298	18
19	2.074	0	9		19	10.662	0	32		24	11.0864	8.04	7.107	1.13128	0.883955	19
20	6.01	0	17		20	3.922	0	22		4	10.9016	7.251	8.675	0.83585	1.19639	20
21	4.83	0	18		21	4.9	0	24		22	10.5157	8.738	2.863	3.05204	0.327649	21
22	2.744	0	10		22	13.579	1	43		3	9.94426	12.018	2.068	5.81141	0.172075	22
23	1.583	0	10		23	13.148	1	37		30	9.30251	11.531	3.236	3.56335	0.280635	23
24	0.939	0	5		24	9.816	0	30		13	8.88425	9.695	3.444	2.81504	0.355235	24
25	0.764	0	4		25	9.709	1	23		1	7.95735	15.681	1.513	10.3642	0.0964862	25
26	0.67	0	4		26	9.635	1	24		17	6.94712	11.993	2.998	4.00033	0.249979	26
27	0.586	0	4		27	9.798	1	28		6	6.73937	14.963	2.275	6.57714	0.152042	27
28	0.691	0	5		28	8.266	0	25		7	6.31193	16.368	1.451	11.2805	0.0886486	28
29	0.675	0	5		29	7.892	0	25		14	6.03178	18.63	2.468	7.54862	0.132475	29
30	0.798	0	5		30	12.099	1	33		20	5.51511	18.564	2.056	9.02918	0.110752	30
31	0.812	0	5		31	9.324	0	27		5	5.27027	10.238	4.23	2.42033	0.413167	31
32	0.737	0	5		32	10.028	0	26		2	5.04156	12.091	3.701	3.26695	0.306095	32
33	0.643	0	5		33	9.813	1	27		9	5.01212	11.052	6.376	1.73338	0.576909	33
34	0.956	0	6		34	8.126	0	25		11	4.69377	10.729	6.049	1.77368	0.563799	34

## Sheet: Feuil2
Type	X(micron)	Y(micron)	Z(micron)			Type	X(micron)	Y(micron)	Z(micron)		Distance to NB	Distance to NB	Syp mean level	Imp mean level	Syp/Imp	helper column
35	60.319	10.269	40.432			35	0	0	0
6	60.852	15.061	38.304			5	0.533	4.792	-2.128		5.27027	4.69377	17.555	2.056	8.53842	34	0.117647
12	59.634	18.103	39.216			1	-0.685	7.834	-1.216		7.95735	5.01212	10.464	6.049	1.72987	33	0.0655253
13	61.384	20.081	39.216			3	1.065	9.812	-1.216		9.94426	5.04156	12.393	3.701	3.34855	32	0.0847694
7	65.568	14.452	39.824			6	5.249	4.183	-0.608		6.73937	5.27027	18.63	2.468	7.54862	31	0.0848052
14	62.905	20.842	41.04			4	2.586	10.573	0.608		10.9016	5.51511	10.018	4.23	2.36832	30	0.0598081
5	59.711	14.833	41.344			11	-0.608	4.564	0.912		4.69377	6.03178	9.695	3.444	2.81504	29	0.0695381
34	67.393	54.082	41.344			10	7.074	43.813	0.912		44.3898	6.31193	14.874	1.513	9.8308	28	0.0734942
10	62.905	15.897	41.648			7	2.586	5.628	1.216		6.31193	6.73937	16.368	1.451	11.2805	27	0.0870871
3	64.655	11.714	42.56			2	4.336	1.445	2.128		5.04156	6.94712	10.588	6.376	1.6606	26	0.0786899
31	60.243	36.055	42.56			12	-0.076	25.786	2.128		25.8738	7.95735	11.531	3.236	3.56335	25	0.0956601
33	63.133	45.943	42.56			8	2.814	35.674	2.128		35.848	8.88425	14.963	2.275	6.57714	24	0.120399
20	63.97	22.211	42.864			15	3.651	11.942	2.432		12.7223	9.30251	7.251	8.675	0.83585	23	0.0659559
8	66.252	15.974	43.776			13	5.933	5.705	3.344		8.88425	9.94426	11.641	2.068	5.62911	22	0.194054
1	63.362	8.671	44.08			9	3.043	-1.598	3.648		5.01212	10.5157	11.993	2.998	4.00033	21	0.985714
11	58.417	14.68	44.08			14	-1.902	4.411	3.648		6.03178	10.9016	8.309	2.863	2.9022	20	0.202077
2	65.72	11.258	44.688			17	5.401	0.989	4.256		6.94712	11.0864	4.709	7.764	0.606517	19	1.53238
30	57.961	28.296	44.688			16	-2.358	18.027	4.256		18.6721	11.6608	8.134	7.107	1.14451	18	0.248648
18	58.417	21.298	45.6			18	-1.902	11.029	5.168		12.3274	12.3274	2.713	10.911	0.248648	17	1.14451
4	60.395	10.953	45.904			20	0.076	0.684	5.472		5.51511	12.7223	6.01	3.922	1.53238	16	0.606517
9	66.937	16.05	46.208			22	6.618	5.781	5.776		10.5157	15.6876	2.744	13.579	0.202077	15	2.9022
32	58.57	38.336	46.512			21	-1.749	28.067	6.08		28.7712	15.7102	4.83	4.9	0.985714	14	4.00033
21	64.883	23.732	47.12			19	4.564	13.463	6.688		15.7102	16.0692	2.069	10.662	0.194054	13	5.62911
15	63.894	11.41	48.944			30	3.575	1.141	8.512		9.30251	18.6721	0.798	12.099	0.0659559	12	0.83585
16	65.644	15.213	49.552			23	5.325	4.944	9.12		11.6608	20.576	1.583	13.148	0.120399	11	6.57714
17	61.232	16.506	49.552			24	0.913	6.237	9.12		11.0864	21.3754	0.939	9.816	0.0956601	10	3.56335
24	59.634	29.589	49.552			25	-0.685	19.32	9.12		21.3754	25.695	0.764	9.709	0.0786899	9	1.6606
19	59.787	23.048	50.16			31	-0.532	12.779	9.728		16.0692	25.8738	0.812	9.324	0.0870871	8	11.2805
28	63.438	40.618	50.464			32	3.119	30.349	10.032		32.1159	28.7712	0.737	10.028	0.0734942	7	9.8308
29	67.165	42.596	51.376			26	6.846	32.327	10.944		34.8091	30.019	0.67	9.635	0.0695381	6	2.81504
23	63.742	27.155	51.68			27	3.423	16.886	11.248		20.576	30.7443	0.586	9.798	0.0598081	5	2.36832
25	61.916	33.316	51.68			28	1.597	23.047	11.248		25.695	32.1159	0.701	8.266	0.0848052	4	7.54862
22	63.362	20.081	52.288			29	3.043	9.812	11.856		15.6876	34.8091	0.669	7.892	0.0847694	3	3.34855
27	61.308	38.489	52.592			33	0.989	28.22	12.16		30.7443	35.848	0.643	9.813	0.0655253	2	1.72987
26	64.959	36.891	53.504			34	4.64	26.622	13.072		30.019	44.3898	0.956	8.126	0.117647	1	8.53842
