# Supplementary material for: The role of Imp and Syp RNA-binding proteins in precise neuronal elimination by apoptosis through the regulation of transcription factors
Source: eLife journal article supplement (doi:10.7554/elife.91634), 2023-10-11
Supplement: fig7-data1 [file ROIs Protein measurement - 01 02 T1.xlsx]

## Sheet: Feuil1
Syp					Imp					Sorted for distance
	Mean	Min	Max			Mean	Min	Max
1	26.929	9	64		1	1.738	0	10
2	20.477	7	55		2	1.425	0	10
3	17.875	4	55		3	1.949	0	7
4	12.614	3	30		4	3.044	0	14
5	11.866	2	33		5	5.685	0	22
6	14.045	5	29		6	3.211	0	15
7	11.121	2	32		7	4.395	0	17
8	13.5	1	42		8	2.054	0	9
9	12.233	1	41		9	3.107	0	22
10	9.947	0	31		10	3.377	0	25
11	12.156	1	32		11	3.117	0	14
12	8.902	0	27		12	3.331	0	19
13	8.378	0	24		13	4.744	0	18
14	5.752	0	22		14	6.538	0	29
15	2.774	0	14		15	10.752	0	31
16	2.784	0	13		16	10.659	1	50
17	5.488	0	19		17	8.572	0	31
18	7.958	0	21		18	6.783	0	28
19	3.42	0	14		19	12.08	0	44
20	7.234	0	21		20	4.573	0	15
21	4.16	0	15		21	5.898	0	21
22	1.993	0	9		22	14.504	0	54
23	1.864	0	10		23	16.4	1	43
24	1.326	0	9		24	13.832	1	45
25	1.249	0	10		25	12.165	1	33
26	1.622	0	10		26	11.785	1	32
27	1.773	0	10		27	12.572	1	32
28	0.951	0	6		28	12.204	1	39
29	1.007	0	6		29	11.197	0	29
30	1.097	0	6		30	11.341	1	31
31	1.114	0	6		31	11.462	1	31
32	0.989	0	7		32	12.175	1	37
33	0.822	0	5		33	10.465	0	30
34	0.863	0	5		34	9.832	0	28
35	0.765	0	5		35	10.589	1	28
36	0.734	0	5		36	9.614	0	29
37	0.835	0	5		37	8.901	0	30

## Sheet: Feuil2
Type	X(micron)	Y(micron)	Z(micron)			Type	X(micron)	Y(micron)	Z(micron)		Distance to NB	Distance to NB	Syp mean level	Imp mean level	Syp/Imp	Imp/Syp	helper
38	8.671	13.159	17.328			38	0	0	0		0	0			0.0938097	10.6599	37
1	9.964	17.951	17.328			37	1.293	4.792	0		4.96338	38.2192	0.835	8.901	0.0785475	12.7311	36
2	6.998	18.408	17.632			33	-1.673	5.249	0.304		5.51755	29.9379	0.822	10.465	0.0722448	13.8418	35
3	10.345	21.602	17.632			35	1.674	8.443	0.304		8.61272	34.7311	0.765	10.589	0.076347	13.0981	34
9	13.159	24.417	17.936			36	4.488	11.258	0.608		12.1348	39.7449	0.734	9.614	0.0877746	11.3928	33
12	6.846	22.135	18.24			34	-1.825	8.976	0.912		9.20494	32.878	0.863	9.832	0.141028	7.09081	32
8	14.452	23.732	20.064			27	5.781	10.573	2.736		12.3569	23.5224	1.773	12.572	0.0971907	10.289	31
5	12.246	15.289	20.368			31	3.575	2.13	3.04		5.15355	27.958	1.114	11.462	0.081232	12.3104	30
11	11.334	24.645	20.368			32	2.663	11.486	3.04		12.1763	28.6286	0.989	12.175	0.0899348	11.1192	29
13	15.897	27.307	20.672			29	7.226	14.148	3.344		16.2346	29.0461	1.007	11.197	0.0779253	12.8328	28
7	13.844	19.625	21.28			28	5.173	6.466	3.952		9.17537	26.4251	0.951	12.204	0.0958647	10.4314	27
15	7.911	25.71	21.28			24	-0.76	12.551	3.952		13.1804	22.5198	1.326	13.832	0.137633	7.26572	26
10	8.215	20.842	21.888			26	-0.456	7.683	4.56		8.94595	22.7465	1.622	11.785	0.283113	3.53216	25
16	4.792	23.504	22.496			19	-3.879	10.345	5.168		12.1973	11.4053	3.42	12.08	0.0967287	10.3382	24
6	9.584	16.734	22.8			30	0.913	3.575	5.472		6.59977	27.7653	1.097	11.341	0.640224	1.56195	23
14	11.79	27.231	22.8			17	3.119	14.072	5.472		15.4173	11.4879	5.488	8.572	0.102672	9.73979	22
4	9.432	16.81	23.104			25	0.761	3.651	5.776		6.8754	21.7737	1.249	12.165	0.13741	7.27747	21
21	18.788	28.372	23.712			22	10.117	15.213	6.384		19.3532	18.4447	1.993	14.504	3.93724	0.253985	20
20	17.419	23.2	24.016			9	8.748	10.041	6.688		14.9023	12.1348	12.233	3.107	0.257999	3.87599	19
24	12.855	34.153	24.32			15	4.184	20.994	6.992		22.5198	13.1804	2.774	10.752	1.17323	0.85235	18
18	14.148	19.016	24.928			18	5.477	5.857	7.6		11.0482	11.0482	7.958	6.783	3.8999	0.256417	17
19	7.15	21.526	24.928			11	-1.521	8.367	7.6		11.4053	12.1763	12.156	3.117	4.37403	0.228622	16
23	6.998	28.372	24.928			6	-1.673	15.213	7.6		17.0878	6.59977	14.045	3.211	1.76602	0.566245	15
17	10.345	20.69	25.84			13	1.674	7.531	8.512		11.4879	16.2346	8.378	4.744	6.57254	0.152148	14
27	23.352	29.285	26.144			8	14.681	16.126	8.816		23.5224	12.3569	13.5	2.054	4.14389	0.241319	13
22	12.703	28.676	26.448			4	4.032	15.517	9.12		18.4447	6.8754	12.614	3.044	0.113659	8.79828	12
26	19.244	30.958	26.752			23	10.573	17.799	9.424		22.7465	17.0878	1.864	16.4	0.705324	1.41779	11
29	22.515	36.891	26.752			21	13.844	23.732	9.424		29.0461	19.3532	4.16	5.898	1.58189	0.632154	10
28	17.114	35.826	27.968			20	8.443	22.667	10.64		26.4251	14.9023	7.234	4.573	2.08725	0.4791	9
30	25.938	31.947	28.272			5	17.267	18.788	10.944		27.7653	5.15355	11.866	5.685	2.94551	0.339499	8
25	14.985	30.502	28.88			10	6.314	17.343	11.552		21.7737	8.94595	9.947	3.377	2.67247	0.374186	7
32	15.669	38.26	29.184			12	6.998	25.101	11.856		28.6286	9.20494	8.902	3.331	9.17137	0.109035	6
31	22.971	33.697	29.792			3	14.3	20.538	12.464		27.958	8.61272	17.875	1.949	0.261188	3.82866	5
37	23.504	45.867	30.4			16	14.833	32.708	13.072		38.2192	12.1973	2.784	10.659	0.87978	1.13665	4
33	20.994	36.587	31.312			14	12.323	23.428	13.984		29.9379	15.4173	5.752	6.538	14.3698	0.0695903	3
35	24.797	40.238	31.92			2	16.126	27.079	14.592		34.7311	5.51755	20.477	1.425	2.53038	0.395198	2
34	19.32	40.466	32.224			7	10.649	27.307	14.896		32.878	9.17537	11.121	4.395	15.4942	0.0645401	1
36	25.253	45.487	33.44			1	16.582	32.328	16.112		39.7449	4.96338	26.929	1.738
