# Supplementary material for: The role of Imp and Syp RNA-binding proteins in precise neuronal elimination by apoptosis through the regulation of transcription factors
Source: eLife journal article supplement (doi:10.7554/elife.91634), 2023-10-11
Supplement: fig7-data1 [file ROIs Protein measurement - 01 02 T3.xlsx]

## Sheet: Feuil1
Syp					Imp					Sorted for distance
	Mean	Min	Max			Mean	Min	Max
1	11.128	0	33		1	1.593	0	7
2	10.769	2	30		2	1.414	0	7
3	8.304	0	22		3	1.098	0	7
4	6.633	0	16		4	1.892	0	11
5	7.835	1	25		5	2.296	0	11
6	5.792	0	17		6	5.235	0	23
7	6.415	0	17		7	1.97	0	9
8	7.553	1	20		8	3.261	0	16
9	6.004	0	16		9	2.446	0	19
10	5.658	0	16		10	3.381	0	17
11	4.39	0	11		11	3.324	0	13
12	3.219	0	11		12	4.528	0	20
13	3.287	0	11		13	3.767	0	14
14	2.4	0	12		14	7.5	0	20
15	0.992	0	10		15	7.881	0	21
16	1.108	0	7		16	9.133	0	24
17	1.21	0	9		17	6.779	0	21
18	0.521	0	4		18	8.628	0	23
19	2.364	0	8		19	8.402	0	26
20	1.858	0	9		20	6.742	1	18
21	1.336	0	8		21	10.259	0	30
22	3.23	0	12		22	4.317	0	22
23	0.822	0	7		23	12.097	0	37
24	1.101	0	6		24	9.916	1	27
25	0.613	0	5		25	8.99	1	26
26	0.445	0	4		26	8.607	0	25
27	0.644	0	5		27	7.519	0	22
28	0.502	0	4		28	7.765	0	23
29	0.56	0	6		29	8.122	0	25
30	0.961	0	7		30	10.701	1	26
31	0.618	0	5		31	10.444	0	30
32	0.718	0	5		32	9.644	0	26
33	0.462	0	4		33	8.756	0	24

## Sheet: Feuil2
Type	X(micron)	Y(micron)	Z(micron)			Type	X(micron)	Y(micron)	Z(micron)		Distance to NB	Distance to NB	Syp mean level	Imp mean level	Syp/Imp	Imp/Syp
34	116.15	27.003	60.192			34	0	0	0		0	29.2349	0.462	8.756	0.0527638	18.9524
31	119.573	51.876	51.68			33	3.423	24.873	-8.512		26.5111	27.3982	0.56	8.122	0.0689485	14.5036
8	115.466	36.207	53.504			29	-0.684	9.204	-6.688		11.3978	26.5111	0.618	10.444	0.0591727	16.8997
30	116.683	48.681	53.808			31	0.533	21.678	-6.384		22.6048	24.1259	0.502	7.765	0.0646491	15.4681
7	115.694	32.403	55.024			28	-0.456	5.4	-5.168		7.4884	23.6749	0.644	7.519	0.0856497	11.6755
24	117.291	44.269	56.24			27	1.141	17.266	-3.952		17.7492	23.1367	0.718	9.644	0.0744504	13.4318
33	118.052	55.907	56.24			32	1.902	28.904	-3.952		29.2349	22.6048	0.961	10.701	0.0898047	11.1353
21	117.976	40.466	56.544			30	1.826	13.463	-3.648		14.0675	20.2605	0.445	8.607	0.0517021	19.3416
32	122.159	49.138	57.152			26	6.009	22.135	-3.04		23.1367	19.4914	0.613	8.99	0.0681869	14.6656
9	119.117	36.663	57.76			25	2.967	9.66	-2.432		10.3939	18.1951	0.521	8.628	0.0603848	16.5605
10	115.009	34.153	57.76			18	-1.141	7.15	-2.432		7.638	17.7492	1.101	9.916	0.111033	9.00636
23	123.224	42.064	58.368			24	7.074	15.061	-1.824		16.7392	17.1917	1.108	9.133	0.121318	8.24278
6	112.88	29.665	58.976			16	-3.27	2.662	-1.216		4.38837	16.7392	0.822	12.097	0.0679507	14.7165
28	116.911	51.115	59.888			23	0.761	24.112	-0.304		24.1259	16.0016	1.21	6.779	0.178492	5.60248
19	112.956	34.914	60.192			17	-3.194	7.911	0		8.53145	15.9973	0.992	7.881	0.125872	7.94456
22	121.095	39.477	60.192			15	4.945	12.474	0		13.4184	14.0675	1.336	10.259	0.130227	7.67889
25	122.768	45.334	60.496			21	6.618	18.331	0.304		19.4914	13.7623	2.4	7.5	0.32	3.125
29	116.15	54.386	61.104			14	0	27.383	0.912		27.3982	13.4184	3.23	4.317	0.748205	1.33653
27	120.714	50.202	61.408			22	4.564	23.199	1.216		23.6749	12.742	3.287	3.767	0.872578	1.14603
4	120.334	35.674	62.016			13	4.184	8.671	1.824		9.79893	11.6435	3.219	4.528	0.71091	1.40665
1	114.705	28.676	62.928			12	-1.445	1.673	2.736		3.51748	11.3978	7.553	3.261	2.31616	0.431749
20	114.325	35.978	63.536			8	-1.825	8.975	3.344		9.75006	10.3939	6.004	2.446	2.45462	0.407395
3	119.725	32.023	63.84			9	3.575	5.02	3.648		7.16163	10.2339	4.39	3.324	1.3207	0.757175
26	120.03	46.551	63.84			11	3.88	19.548	3.648		20.2605	9.79893	6.633	1.892	3.50581	0.28524
5	117.748	33.773	64.448			4	1.598	6.77	4.256		8.15476	9.75006	1.858	6.742	0.275586	3.62863
17	124.517	39.858	64.752			20	8.367	12.855	4.56		16.0016	8.53145	2.364	8.402	0.281362	3.55415
2	117.215	27.84	65.968			19	1.065	0.837	5.776		5.9327	8.15476	7.835	2.296	3.41246	0.293044
16	121.703	41.835	66.88			5	5.553	14.832	6.688		17.1917	7.638	5.658	3.381	1.67347	0.597561
18	117.215	43.357	68.096			10	1.065	16.354	7.904		18.1951	7.4884	6.415	1.97	3.25635	0.307093
11	119.269	27.611	69.92			7	3.119	0.608	9.728		10.2339	7.16163	8.304	1.098	7.56284	0.132225
13	121.931	32.86	69.92			3	5.781	5.857	9.728		12.742	5.9327	10.769	1.414	7.61598	0.131303
14	118.052	35.522	70.832			2	1.902	8.519	10.64		13.7623	4.38837	5.792	5.235	1.1064	0.903833
15	116.455	38.945	70.832			6	0.305	11.942	10.64		15.9973	3.51748	11.128	1.593	6.98556	0.143152
12	116.987	29.893	71.44			1	0.837	2.89	11.248		11.6435

## Sheet: Feuil3
Type	X(micron)	Y(micron)	Z(micron)
31	119.573	51.876	51.68
8	115.466	36.207	53.504
30	116.683	48.681	53.808
7	115.694	32.403	55.024
24	117.291	44.269	56.24
33	118.052	55.907	56.24
21	117.976	40.466	56.544
32	122.159	49.138	57.152
9	119.117	36.663	57.76
10	115.009	34.153	57.76
23	123.224	42.064	58.368
6	112.88	29.665	58.976
28	116.911	51.115	59.888
19	112.956	34.914	60.192
22	121.095	39.477	60.192
34	116.15	27.003	60.192
25	122.768	45.334	60.496
29	116.15	54.386	61.104
27	120.714	50.202	61.408
4	120.334	35.674	62.016
1	114.705	28.676	62.928
20	114.325	35.978	63.536
3	119.725	32.023	63.84
26	120.03	46.551	63.84
5	117.748	33.773	64.448
17	124.517	39.858	64.752
2	117.215	27.84	65.968
16	121.703	41.835	66.88
18	117.215	43.357	68.096
11	119.269	27.611	69.92
13	121.931	32.86	69.92
14	118.052	35.522	70.832
15	116.455	38.945	70.832
12	116.987	29.893	71.44
