# Supplementary material for: The role of Imp and Syp RNA-binding proteins in precise neuronal elimination by apoptosis through the regulation of transcription factors
Source: eLife journal article supplement (doi:10.7554/elife.91634), 2023-10-11
Supplement: fig7-data1 [file ROIs Protein measurement - 03 T1.xlsx]

## Sheet: Feuil1
Syp					Imp					Sorted for distance
	Mean	Min	Max			Mean	Min	Max
1	12.164	2	30		1	2.44	0	11
2	12.361	0	31		2	2.888	0	12
3	10.963	1	34		3	3.241	0	14
4	5.14	0	18		4	8.268	0	33
5	5.925	0	20		5	4.164	0	17
6	7.364	0	28		6	4.555	0	30
7	6.581	0	19		7	3.921	0	40
8	6.066	0	18		8	6.424	0	28
9	5.322	0	20		9	4	0	17
10	7.534	0	22		10	3.161	0	12
11	7.567	0	26		11	5.128	0	26
12	6.055	0	20		12	4.401	0	26
13	4.179	0	15		13	3.756	0	20
14	5.202	0	16		14	6.786	0	31
15	2.773	0	11		15	7.195	0	24
16	5.146	0	20		16	11.966	0	46
17	5.672	0	19		17	9.45	0	31
18	3.12	0	13		18	9.488	1	31
19	2.338	0	9		19	10.053	0	39
20	2.034	0	15		20	15.864	1	50
21	2.887	0	9		21	12.246	0	50
22	2.762	0	11		22	15.899	0	49
23	1.52	0	9		23	24.652	4	62
24	1.291	0	6		24	14.529	2	41
25	1.456	0	9		25	16.328	2	50
26	1.294	0	7		26	13.667	1	40
27	1.513	0	10		27	20.122	2	54
28	1.176	0	10		28	17.309	0	52
29	0.803	0	6		29	16.636	1	50
30	0.932	0	5		30	14.892	0	43
31	0.808	0	5		31	14.462	1	43
32	0.74	0	5		32	12.876	1	39
33	0.735	0	5		33	12.106	0	36
34	0.659	0	5		34	14.938	2	44
35	0.779	0	5		35	13.317	1	36
36	0.694	0	5		36	13.232	1	38
37	0.63	0	4		37	13.92	1	37
38	0.596	0	5		38	11.137	0	34

## Sheet: Feuil2
Type	X(micron)	Y(micron)	Z(micron)			Type	X(micron)	Y(micron)	Z(micron)		Distance to NB	Distance to NB	Syp mean level	Imp mean level	Syp/Imp	Imp/Syp
39	125.922	28.135	9.12			38	10.114	0.684	-4.56		11.1155	36.5149	0.596	11.137	0.0535153	18.6862
17	136.036	28.819	4.56			37	6.92	0.532	-2.736		7.46024	34.6	0.63	13.92	0.0452586	22.0952
16	132.842	28.667	6.384			36	1.217	6.539	-1.216		6.76153	32.223	0.694	13.232	0.0524486	19.0663
7	127.139	34.674	7.904			33	4.03	2.737	-0.608		4.90935	28.766	0.735	12.106	0.0607137	16.4707
6	129.952	30.872	8.512			35	-12.242	13.611	-0.608		18.3165	28.0658	0.779	13.317	0.0584967	17.095
26	113.68	41.746	8.512			34	9.429	4.182	-0.304		10.3193	27.2685	0.659	14.938	0.0441157	22.6677
18	135.351	32.317	8.816			32	7.3	0.836	0		7.34771	23.9739	0.74	12.876	0.0574713	17.4
4	133.222	28.971	9.12			31	-8.668	9.505	0		12.8639	22.2588	0.808	14.462	0.0558706	17.8985
25	117.254	37.64	9.12			29	-3.954	6.387	0.304		7.518	21.4009	0.803	16.636	0.0482688	20.7173
20	121.968	34.522	9.424			26	5.323	9.277	0.304		10.7	18.3165	1.294	13.667	0.0946806	10.5618
21	131.245	37.412	9.424			30	-2.965	10.874	0.608		11.2874	18.0216	0.932	14.892	0.0625839	15.9785
23	122.957	39.009	9.728			14	-7.224	13.611	0.608		15.4213	17.3763	5.202	6.786	0.766578	1.3045
24	118.698	41.746	9.728			13	0.533	13.079	0.912		13.1216	15.5103	4.179	3.756	1.11262	0.89878
22	126.455	41.214	10.032			24	2.358	2.433	1.216		3.59977	15.4213	1.291	14.529	0.0888568	11.2541
1	128.28	30.568	10.336			28	0.457	8.212	1.216		8.31411	15.006	1.176	17.309	0.0679415	14.7185
8	126.379	36.347	10.336			27	4.182	5.399	1.824		7.06861	14.5223	1.513	20.122	0.0751913	13.2994
5	130.104	33.534	10.944			15	7.68	8.896	2.432		12.0015	13.9493	2.773	7.195	0.385407	2.59466
19	133.602	37.031	11.552			11	-3.498	13.763	3.04		14.5223	13.3156	7.567	5.128	1.47562	0.677679
27	122.424	41.898	12.16			22	-0.152	5.171	4.256		6.69895	13.1216	2.762	15.899	0.173722	5.75634
2	125.77	33.306	13.376			25	3.118	2.965	4.864		6.49397	12.8639	1.456	16.328	0.089172	11.2143
3	129.04	31.1	13.984			19	-0.152	10.797	4.864		11.843	12.0015	2.338	10.053	0.232567	4.29983
12	125.77	38.932	13.984			12	-10.265	13.991	4.864		18.0216	11.843	6.055	4.401	1.37582	0.726837
30	115.657	42.126	13.984			23	-12.774	19.618	5.168		23.9739	11.2874	1.52	24.652	0.0616583	16.2184
32	113.148	47.753	14.288			17	-1.521	9.125	5.776		10.906	11.1155	5.672	9.45	0.600212	1.66608
9	124.401	37.26	14.896			10	-7.908	18.934	6.08		21.4009	10.9879	7.534	3.161	2.38342	0.419565
29	118.014	47.069	15.2			9	7.072	10.189	6.384		13.9493	10.906	5.322	4	1.3305	0.751597
15	132.994	38.324	15.504			21	-5.551	12.394	6.384		15.006	10.7	2.887	12.246	0.23575	4.24177
28	120.371	40.529	15.504			18	-11.558	25.397	6.992		28.766	10.3193	3.12	9.488	0.328836	3.04103
33	114.364	53.532	16.112			8	4.182	7.072	7.296		10.9879	8.31411	6.066	6.424	0.944271	1.05902
10	130.104	35.207	16.416			20	1.141	10.874	7.6		13.3156	7.518	2.034	15.864	0.128215	7.79941
11	127.063	39.009	16.72			16	-12.166	16.881	7.904		22.2588	7.46024	5.146	11.966	0.430052	2.3253
31	113.756	45.016	17.024			4	3.726	12.622	8.208		15.5103	7.34771	5.14	8.268	0.621674	1.60856
13	129.648	40.757	17.328			5	-1.444	14.904	8.816		17.3763	7.06861	5.925	4.164	1.42291	0.702785
14	124.478	43.039	17.936			7	-12.927	21.671	10.336		27.2685	6.76153	6.581	3.921	1.6784	0.595806
34	112.995	49.806	19.456			2	-12.47	32.317	11.552		36.5149	6.69895	12.361	2.888	4.28012	0.233638
38	113.452	60.452	20.672			3	-9.125	23.268	12.768		28.0658	6.49397	10.963	3.241	3.3826	0.295631
35	116.797	51.403	21.888			6	-13.231	26.462	12.768		32.223	4.90935	7.364	4.555	1.61668	0.61855
36	112.691	54.597	21.888			1	-12.166	28.439	15.504		34.6	3.59977	12.164	2.44	4.98525	0.200592
37	113.756	56.574	24.624
