# Supplementary material for: The role of Imp and Syp RNA-binding proteins in precise neuronal elimination by apoptosis through the regulation of transcription factors
Source: eLife journal article supplement (doi:10.7554/elife.91634), 2023-10-11
Supplement: fig7-data1 [file ROIs Protein measurement - 03 T3.xlsx]

## Sheet: Feuil1
Syp					Imp					Sorted for distance
	Mean	Min	Max			Mean	Min	Max
	Mean	Min	Max			Mean	Min	Max
1	15.039	1	45		1	1.609	0	8
2	20.566	2	44		2	1.697	0	7
3	14.98	1	36		3	2.408	0	9
4	14.676	3	43		4	2.639	0	16
5	13.587	2	45		5	2.439	0	10
6	12.606	1	35		6	4.421	0	18
7	14.066	1	43		7	3.106	0	14
8	16.633	2	43		8	2.784	0	15
9	12.539	1	38		9	4.177	0	19
10	8.682	0	25		10	8.395	0	36
11	6.381	0	24		11	8.752	0	33
12	4.653	0	17		12	14.289	1	39
13	5.563	0	18		13	13.124	0	50
14	2.543	0	10		14	18.708	4	49
15	2.628	0	12		15	19.609	3	55
16	2.382	0	14		16	15.112	2	39
17	2.754	0	18		17	12.195	1	34
18	1.174	0	6		18	12.684	1	31
19	2.686	0	21		19	16.744	2	54
20	2.437	0	9		20	15.673	2	38
21	2.482	0	8		21	16.348	3	39
22	2.166	0	18		22	19.692	2	50
23	1.837	0	7		23	16.233	2	41
24	1.59	0	7		24	17.741	2	48
25	1.344	0	6		25	15.063	2	34
26	1.269	0	6		26	13.768	1	41
27	1.535	0	8		27	18.624	2	46
28	1.008	0	5		28	12.918	1	31
29	1.02	0	5		29	11.466	2	29
30	1.403	0	8		30	14.988	2	40
31	3.7	0	16		31	16.252	1	54
32	9.684	1	28		32	4.826	0	20

## Sheet: Feuil2
Type	X(micron)	Y(micron)	Z(micron)			Type	X(micron)	Y(micron)	Z(micron)		Distance to NB	Distance to NB	Syp mean level	Imp mean level	Syp/Imp	Imp/Syp
33	25.625	49.654	39.52			33	0	0	0		16.1219	28.4702	1.008	12.918	0.0780307	12.8155
10	18.021	61.668	31.92			28	-7.604	12.014	-7.6		13.9898	28.323	1.344	15.063	0.0892253	11.2076
9	21.671	61.288	32.832			25	-3.954	11.634	-6.688		10.7261	26.107	1.837	16.233	0.113165	8.83669
5	20.759	57.03	33.44			23	-4.866	7.376	-6.08		10.8743	25.59	1.02	11.466	0.0889587	11.2412
6	23.953	59.235	34.656			29	-1.672	9.581	-4.864		15.0293	25.1474	1.59	17.741	0.0896229	11.1579
11	14.98	59.083	34.656			24	-10.645	9.429	-4.864		18.1685	24.9504	2.482	16.348	0.151823	6.58662
12	14.676	63.417	34.96			21	-10.949	13.763	-4.56		13.1106	23.2554	1.535	18.624	0.0824205	12.1329
7	20.759	61.06	35.264			27	-4.866	11.406	-4.256		18.826	23.2398	1.269	13.768	0.0921702	10.8495
14	17.945	66.307	35.264			26	-7.68	16.653	-4.256		22.6061	22.6061	2.628	19.609	0.13402	7.46157
15	12.775	67.828	35.568			15	-12.85	18.174	-3.952		5.92495	21.9164	2.437	15.673	0.15549	6.43127
3	24.637	54.217	35.872			20	-0.988	4.563	-3.648		21.9164	21.5805	2.166	19.692	0.109994	9.09141
20	19.618	70.413	35.872			22	-6.007	20.759	-3.648		24.9504	21.1757	1.174	12.684	0.0925576	10.8041
21	14.904	71.934	36.176			18	-10.721	22.28	-3.344		11.5505	19.8357	1.403	14.988	0.0936082	10.6828
8	17.717	57.714	37.088			30	-7.908	8.06	-2.432		15.9056	19.8238	2.686	16.744	0.160416	6.2338
13	13.003	59.159	37.696			19	-12.622	9.505	-1.824		26.107	18.826	2.543	18.708	0.135931	7.35667
23	18.934	74.823	37.696			14	-6.691	25.169	-1.824		18.4711	18.4711	3.7	16.252	0.227664	4.39243
31	13.231	63.265	38			31	-12.394	13.611	-1.52		14.0477	18.1685	4.653	14.289	0.325635	3.07092
32	20.531	62.657	38			12	-5.094	13.003	-1.52		2.33256	17.4404	2.382	15.112	0.157623	6.34425
1	23.648	50.491	38.608			16	-1.977	0.837	-0.912		6.57449	16.3714	2.754	12.195	0.22583	4.4281
2	20.835	54.064	38.608			17	-4.79	4.41	-0.912		21.5805	16.1219	8.682	8.395	1.03419	0.966943
22	13.307	67.371	39.216			10	-12.318	17.717	-0.304		23.2398	15.9056	5.563	13.124	0.42388	2.35916
26	22.584	72.694	39.52			13	-3.041	23.04	0		25.1474	15.0293	6.381	8.752	0.72909	1.37157
24	12.927	71.326	40.736			11	-12.698	21.672	1.216		28.323	14.0477	9.684	4.826	2.00663	0.498348
25	14.296	75.584	40.736			32	-11.329	25.93	1.216		10.328	13.9898	12.539	4.177	3.00192	0.333121
4	18.402	56.878	41.04			9	-7.223	7.224	1.52		19.8357	13.1106	14.066	3.106	4.52865	0.220816
30	20.835	68.816	41.344			7	-4.79	19.162	1.824		23.2554	11.5505	16.633	2.784	5.9745	0.167378
27	12.623	68.74	42.256			8	-13.002	19.086	2.736		17.4404	10.8743	12.606	4.421	2.85139	0.350706
16	18.554	65.242	42.864			6	-7.071	15.588	3.344		19.8238	10.7261	13.587	2.439	5.57073	0.17951
19	13.079	64.634	42.864			5	-12.546	14.98	3.344		28.4702	10.328	14.676	2.639	5.5612	0.179817
28	15.816	76.04	43.776			4	-9.809	26.386	4.256		21.1757	6.57449	20.566	1.697	12.119	0.0825148
18	14.448	66.687	45.296			2	-11.177	17.033	5.776		25.59	5.92495	14.98	2.408	6.22093	0.160748
29	14.143	71.782	45.296			3	-11.482	22.128	5.776		16.3714	2.33256	15.039	1.609	9.3468	0.106988
17	15.664	61.136	45.6			1	-9.961	11.482	6.08
