# Supplementary material for: The role of Imp and Syp RNA-binding proteins in precise neuronal elimination by apoptosis through the regulation of transcription factors
Source: eLife journal article supplement (doi:10.7554/elife.91634), 2023-10-11
Supplement: fig7-data1 [file ROIs Protein measurement - 04 T1.xlsx]

## Sheet: Feuil1
Syp					Imp					Sorted for distance
	Mean	Min	Max			Mean	Min	Max
1	20.396	5	56		1	3.11	0	19
2	15.382	2	46		2	2.665	0	12
3	13.743	2	39		3	6.502	0	29
4	10.184	1	28		4	3.345	0	31
5	9.573	0	29		5	4.838	0	47
6	13.294	1	35		6	3.548	0	26
7	10.321	1	32		7	5.188	0	74
8	8.481	0	26		8	6.646	0	47
9	10.334	1	30		9	8.396	0	54
10	8.831	0	34		10	5.457	0	32
11	7.362	0	25		11	9.809	0	44
12	7.611	0	23		12	8.811	0	31
13	12.504	2	36		13	3.732	0	20
14	9.047	1	33		14	6.744	0	38
15	5.937	0	19		15	13.013	0	50
16	3.787	0	15		16	16.122	2	58
17	4.056	0	21		17	17.697	1	67
18	4.986	0	27		18	20.283	1	78
19	5.647	0	22		19	19.835	1	82
20	2.571	0	13		20	19.302	1	63
21	1.97	0	11		21	21.302	3	72
22	3.684	0	22		22	22.012	0	75
23	1.621	0	8		23	19.457	2	55
24	1.382	0	6		24	17.318	2	49
25	2.044	0	12		25	15.85	1	47
26	1.663	0	14		26	16.823	3	53
27	1.322	0	6		27	17.135	2	49
28	1.316	0	8		28	15.708	1	42
29	2.391	0	24		29	19.96	2	57
30	3.898	0	14		30	18.564	1	58
31	2.899	0	9		31	20.443	1	61
32	1.623	0	8		32	17.406	2	47
33	1.435	0	10		33	14.49	2	38
34	1.885	0	9		34	16.442	4	41
35	1.14	0	5		35	13.822	1	43
36	1.303	0	7		36	13.027	0	41

## Sheet: Feuil2
Type	X(micron)	Y(micron)	Z(micron)			Type	X(micron)	Y(micron)	Z(micron)		Distance to NB	Distance to NB	Syp mean level	Imp mean level	Syp/Imp	Imp/Syp
37	138.697	54.749	6.688			37	0	0	0		0	40.248	1.303	13.027	0.100023	9.9977
3	134.287	57.106	5.168			36	-4.41	2.357	-1.52		5.22627	38.3119	1.435	14.49	0.0990338	10.0976
7	138.165	64.634	10.336			33	-0.532	9.885	3.648		10.5501	35.449	1.14	13.822	0.0824772	12.1246
13	135.579	61.897	10.336			35	-3.118	7.148	3.648		8.60951	30.8834	1.885	16.442	0.114645	8.72255
1	137.176	57.258	10.64			34	-1.521	2.509	3.952		4.92208	28.93	1.316	15.708	0.083779	11.9362
2	138.317	60.3	10.944			28	-0.38	5.551	4.256		7.00511	28.3165	1.623	17.406	0.0932437	10.7246
12	132.69	58.095	11.248			32	-6.007	3.346	4.56		8.25066	28.0711	1.322	17.135	0.077152	12.9614
14	132.386	64.406	12.768			27	-6.311	9.657	6.08		13.0404	27.9785	2.044	15.85	0.128959	7.7544
8	137.785	64.102	13.376			25	-0.912	9.353	6.688		11.5343	26.0721	2.899	20.443	0.141809	7.05174
5	140.37	58.779	13.68			31	1.673	4.03	6.992		8.24184	25.9486	1.663	16.823	0.0988528	10.1161
6	135.579	61.592	13.984			26	-3.118	6.843	7.296		10.4776	24.6481	1.382	17.318	0.0798014	12.5311
4	137.785	57.334	14.288			24	-0.912	2.585	7.6		8.07923	23.0456	1.621	19.457	0.0833119	12.0031
15	129.192	61.973	14.592			23	-9.505	7.224	7.904		14.318	22.0308	3.684	22.012	0.167363	5.97503
30	127.975	70.869	16.416			22	-10.722	16.12	9.728		21.6668	21.6668	3.898	18.564	0.209976	4.76244
9	133.45	65.394	17.024			30	-5.247	10.645	10.336		15.7379	21.4555	1.97	21.302	0.0924796	10.8132
10	132.994	60.376	17.328			21	-5.703	5.627	10.64		13.319	21.0121	2.391	19.96	0.11979	8.34797
16	129.04	59.996	17.632			29	-9.657	5.247	10.944		15.51	20.2239	2.571	19.302	0.133199	7.50758
17	126.683	64.862	17.632			20	-12.014	10.113	10.944		19.1411	19.1411	4.056	17.697	0.229191	4.36317
11	129.952	65.014	18.24			17	-8.745	10.265	11.552		17.7565	17.7565	7.362	9.809	0.750535	1.33238
29	130.485	70.261	18.24			11	-8.212	15.512	11.552		21.0121	17.4366	5.647	19.835	0.284699	3.51248
31	127.291	74.975	18.544			19	-11.406	20.226	11.856		26.0721	17.436	4.986	20.283	0.245822	4.06799
22	124.401	65.242	19.76			18	-14.296	10.493	13.072		22.0308	15.7379	10.334	8.396	1.23082	0.812464
19	130.941	62.809	20.064			9	-7.756	8.06	13.376		17.4366	15.51	3.787	16.122	0.234896	4.2572
18	130.865	62.201	20.368			16	-7.832	7.452	13.68		17.436	14.318	5.937	13.013	0.456236	2.19185
20	132.158	68.132	20.368			15	-6.539	13.383	13.68		20.2239	13.319	8.831	5.457	1.61829	0.617937
34	125.162	78.549	20.976			10	-13.535	23.8	14.288		30.8834	13.0404	9.047	6.744	1.34149	0.74544
21	126.074	63.113	21.888			14	-12.623	8.364	15.2		21.4555	11.5343	8.481	6.646	1.27611	0.783634
25	121.284	68.892	23.408			8	-17.413	14.143	16.72		27.9785	10.5501	10.321	5.188	1.9894	0.502664
32	128.66	75.28	23.408			7	-10.037	20.531	16.72		28.3165	10.4776	13.294	3.548	3.7469	0.266887
23	128.66	66.155	24.016			6	-10.037	11.406	17.328		23.0456	8.60951	12.504	3.732	3.35048	0.298464
24	130.333	69.805	24.32			13	-8.364	15.056	17.632		24.6481	8.25066	7.611	8.811	0.863807	1.15767
26	123.641	65.927	24.624			12	-15.056	11.178	17.936		25.9486	8.24184	9.573	4.838	1.97871	0.50538
33	117.254	80.298	25.536			5	-21.443	25.549	18.848		38.3119	8.07923	10.184	3.345	3.04454	0.328456
27	125.086	70.109	25.84			4	-13.611	15.36	19.152		28.0711	7.00511	15.382	2.665	5.77186	0.173254
28	126.987	71.63	27.056			2	-11.71	16.881	20.368		28.93	5.22627	13.743	6.502	2.11366	0.473114
35	122.653	78.397	27.664			3	-16.044	23.648	20.976		35.449	4.92208	20.396	3.11	6.5582	0.152481
36	120.371	82.884	28.88			1	-18.326	28.135	22.192		40.248

## Sheet: Feuil3
Type	X(micron)	Y(micron)	Z(micron)
3	134.287	57.106	5.168
37	138.697	54.749	6.688
7	138.165	64.634	10.336
13	135.579	61.897	10.336
1	137.176	57.258	10.64
2	138.317	60.3	10.944
12	132.69	58.095	11.248
14	132.386	64.406	12.768
8	137.785	64.102	13.376
5	140.37	58.779	13.68
6	135.579	61.592	13.984
4	137.785	57.334	14.288
15	129.192	61.973	14.592
30	127.975	70.869	16.416
9	133.45	65.394	17.024
10	132.994	60.376	17.328
16	129.04	59.996	17.632
17	126.683	64.862	17.632
11	129.952	65.014	18.24
29	130.485	70.261	18.24
31	127.291	74.975	18.544
22	124.401	65.242	19.76
19	130.941	62.809	20.064
18	130.865	62.201	20.368
20	132.158	68.132	20.368
34	125.162	78.549	20.976
21	126.074	63.113	21.888
25	121.284	68.892	23.408
32	128.66	75.28	23.408
23	128.66	66.155	24.016
24	130.333	69.805	24.32
26	123.641	65.927	24.624
33	117.254	80.298	25.536
27	125.086	70.109	25.84
28	126.987	71.63	27.056
35	122.653	78.397	27.664
36	120.371	82.884	28.88
