# Supplementary material for: The role of Imp and Syp RNA-binding proteins in precise neuronal elimination by apoptosis through the regulation of transcription factors
Source: eLife journal article supplement (doi:10.7554/elife.91634), 2023-10-11
Supplement: fig7-data1 [file ROIs Protein measurement 03 T2.xlsx]

## Sheet: Feuil1
Syp					Imp					Sorted for distance
	Mean	Min	Max			Mean	Min	Max
1	14.72	1	56		1	2.155	0	10
2	11.384	1	30		2	1.766	0	10
3	13.564	0	39		3	2.013	0	9
4	10.825	1	35		4	2.675	0	15
5	9.833	0	25		5	3.054	0	32
6	8.177	0	25		6	4.713	0	20
7	5.248	0	18		7	7.323	0	23
8	8.022	1	29		8	3.303	0	13
9	6.175	0	27		9	5.464	0	24
10	5.142	0	19		10	6.321	0	26
11	8.797	1	19		11	4.514	0	19
12	7.094	0	23		12	1.964	0	11
13	5.263	0	19		13	3.571	0	23
14	6.379	0	21		14	3.587	0	24
15	4.175	0	14		15	16.98	0	58
16	3.451	0	15		16	9.518	0	51
17	3.762	0	16		17	17.909	0	70
18	2.642	0	19		18	10.732	0	46
19	3.617	0	15		19	10.544	0	55
20	2.041	0	10		20	17.766	1	60
21	4.218	0	15		21	7.765	0	38
22	1.683	0	10		22	19.945	2	61
23	2.675	0	15		23	15.295	0	49
24	1.405	0	10		24	13.066	0	39
25	0.948	0	6		25	17.36	0	42
26	1.107	0	6		26	13.59	0	44
27	0.654	0	5		27	13.556	1	34
28	0.703	0	6		28	12.831	0	37
29	0.649	0	6		29	14.839	1	39
30	0.654	0	5		30	13.897	0	38
31	0.551	0	5		31	12.311	0	38
32	0.563	0	4		32	11.778	0	32
33	1.001	0	6		33	14.826	0	43
34	1.652	0	10		34	14.128	1	43
35	3.932	0	16		35	18.688	2	61

## Sheet: Feuil2
Type	X(micron)	Y(micron)	Z(micron)			Type	X(micron)	Y(micron)	Z(micron)		Distance to NB	Distance to NB	Syp mean level	Imp mean level	Syp/Imp	Imp/Syp	helper
36	83.34	33.914	7.6			36	0	0	0			32.9797	0.563	11.778	0.047801	20.9201	1
1	84.328	37.564	5.472			1	0.988	3.65	-2.128			32.5744	0.551	12.311	0.0447567	22.343	2
2	84.252	40.605	6.08			8	0.912	6.691	-1.52			28.4397	0.654	13.897	0.0470605	21.2492	3
4	82.579	43.115	9.12			6	-0.761	9.201	1.52			26.4426	0.649	14.839	0.0437361	22.8644	4
3	84.48	38.932	9.728			3	1.14	5.018	2.128			25.9878	0.703	12.831	0.0547892	18.2518	5
35	77.181	46.004	10.944			9	-6.159	12.09	3.344			24.6159	1.652	14.128	0.116931	8.55206	6
5	83.036	42.582	11.552			2	-0.304	8.668	3.952			22.9589	0.654	13.556	0.0482443	20.7278	7
8	81.819	35.054	11.552			7	-1.521	1.14	3.952			21.8233	1.001	14.826	0.0675165	14.8112	8
11	79.69	39.617	11.552			10	-3.65	5.703	3.952			20.5876	0.948	17.36	0.0546083	18.3122	9
6	85.241	33.458	11.856			11	1.901	-0.456	4.256			19.0436	1.107	13.59	0.081457	12.2764	10
9	81.591	35.359	12.768			4	-1.749	1.445	5.168			16.4776	1.405	13.066	0.107531	9.29964	11
10	86.838	38.628	12.768			12	3.498	4.714	5.168			16.2676	1.683	19.945	0.0843821	11.8509	12
12	83.112	41.746	12.768			5	-0.228	7.832	5.168			15.7406	2.041	17.766	0.114882	8.70456	13
7	88.13	32.545	13.376			15	4.79	-1.369	5.776			15.1494	2.675	15.295	0.174894	5.71776	14
13	85.621	44.027	14.288			21	2.281	10.113	6.688			13.9744	3.932	18.688	0.210402	4.7528	15
17	77.637	40.605	14.288			16	-5.703	6.691	6.688			13.701	3.617	10.544	0.343039	2.91512	16
14	82.351	45.244	14.592			17	-0.989	11.33	6.992			13.3505	6.379	3.587	1.77837	0.562314	17
19	79.31	44.788	14.896			13	-4.03	10.874	7.296			12.9054	2.642	10.732	0.24618	4.06207	18
20	75.052	44.483	15.808			18	-8.288	10.569	8.208			12.3371	5.263	3.571	1.47382	0.67851	19
15	79.462	37.184	16.112			14	-3.878	3.27	8.512			11.0464	3.762	17.909	0.210062	4.7605	20
21	83.796	39.769	16.112			19	0.456	5.855	8.512			10.5063	3.451	9.518	0.362576	2.75804	21
34	73.531	54.825	16.112			35	-9.809	20.911	8.512			10.3413	4.218	7.765	0.543207	1.84092	22
16	88.13	37.031	16.416			23	4.79	3.117	8.816			9.90888	4.175	16.98	0.245878	4.06707	23
33	74.291	50.871	17.936			20	-9.049	16.957	10.336			9.53126	9.833	3.054	3.21971	0.310587	24
18	87.446	37.944	19.152			22	4.106	4.03	11.552			9.38618	7.094	1.964	3.61202	0.276854	25
23	81.667	43.571	19.152			24	-1.673	9.657	11.552			9.3567	10.825	2.675	4.04673	0.247113	26
22	77.789	43.571	19.456			26	-5.551	9.657	11.856			7.83996	8.797	4.514	1.94883	0.513129	27
24	86.153	42.658	21.28			25	2.813	8.744	13.68			7.82087	5.142	6.321	0.813479	1.22929	28
25	77.105	47.677	21.584			33	-6.235	13.763	13.984			7.62761	5.248	7.323	0.716646	1.39539	29
26	83.34	46.841	21.584			27	0	12.927	13.984			6.92182	11.384	1.766	6.44621	0.15513	30
27	81.059	50.11	23.712			34	-2.281	16.196	16.112			5.64405	6.175	5.464	1.13012	0.884858	31
28	82.656	54.293	23.712			28	-0.684	20.379	16.112			5.56851	13.564	2.013	6.7382	0.148408	32
29	77.105	53.684	24.016			29	-6.235	19.77	16.416			4.68351	8.177	4.713	1.73499	0.576373	33
31	75.812	59.615	26.144			30	-7.528	25.701	18.544			4.38536	8.022	3.303	2.4287	0.411743	34
30	80.526	54.749	26.752			31	-2.814	20.835	19.152			4.33901	14.72	2.155	6.83063	0.146399	35
32	80.45	59.691	27.968			32	-2.89	25.777	20.368
