# Supplementary material for: The role of Imp and Syp RNA-binding proteins in precise neuronal elimination by apoptosis through the regulation of transcription factors
Source: eLife journal article supplement (doi:10.7554/elife.91634), 2023-10-11
Supplement: fig7-data1 [file ROIs Protein measurement 04 T2.xlsx]

## Sheet: Feuil1
Syp					Imp					Sorted for distance
	Mean	Min	Max			Mean	Min	Max
1	13.402	1	41		1	7.215	0	44
2	11.971	1	34		2	2.707	0	13
3	13.377	2	30		3	4.254	0	33
4	9.793	1	29		4	5.584	0	34
5	7.68	0	22		5	5.406	0	24
6	7.187	0	25		6	3.373	0	17
7	6.045	0	18		7	3.47	0	22
8	7.056	0	22		8	4.008	0	27
9	8.692	0	30		9	3.413	0	28
10	6.745	0	21		10	6.379	0	27
11	4.733	0	15		11	15.09	1	54
12	3.773	0	15		12	12.868	0	48
13	9.161	0	27		13	6.096	0	26
14	3.052	0	24		14	19.179	1	57
15	4.177	0	16		15	7.723	0	41
16	2.908	0	14		16	11.474	1	39
17	4.727	0	15		17	10.491	0	44
18	4.413	0	17		18	19.944	2	67
19	1.544	0	7		19	22.556	1	72
20	1.533	0	13		20	21.987	2	61
21	1.36	0	10		21	19.644	2	55
22	1.074	0	6		22	18.483	1	51
23	1.374	0	12		23	18.697	2	54
24	1.512	0	8		24	18.4	1	55
25	1.626	0	12		25	14.392	1	40
26	3.125	0	12		26	18.47	1	57
27	1.085	0	5		27	17.143	1	46
28	3.6	0	21		28	22.375	1	64
29	1.249	0	6		29	14.685	1	43
30	1.152	0	7		30	15.725	1	50
31	0.955	0	4		31	15.032	2	45
32	0.901	0	5		32	12.4	0	36
33	1.196	0	8		33	11.875	0	36
34	0.776	0	5		34	13.242	1	32
35	1.392	0	16		35	11.971	1	40

## Sheet: Feuil2
Type	X(micron)	Y(micron)	Z(micron)			Type	X(micron)	Y(micron)	Z(micron)		Distance to NB	Distance to NB	Syp mean level	Imp mean level	Syp/Imp	Imp/Syp	helper
36	95.81	51.479	22.192			36	0	0	0		0	33.6879	1.196	11.875	0.100716	9.92893	2
1	92.313	55.737	22.8			33	-3.497	4.258	0.608		5.5434	32.4532	0.776	13.242	0.0586014	17.0644	3
5	94.518	47.069	24.624			34	-1.292	-4.41	2.432		5.19923	31.2243	0.955	15.032	0.0635311	15.7403	4
2	91.248	54.597	25.232			31	-4.562	3.118	3.04		6.30677	28.4394	0.901	12.4	0.0726613	13.7625	5
6	98.092	47.905	25.536			32	2.282	-3.574	3.344		5.40031	28.0725	1.085	17.143	0.0632911	15.8	6
3	91.02	57.334	26.448			27	-4.79	5.855	4.256		8.67978	27.251	1.626	14.392	0.112979	8.85117	7
10	90.564	49.958	26.752			25	-5.246	-1.521	4.56		7.1153	24.7187	1.152	15.725	0.0732591	13.6502	8
17	92.465	45.776	26.752			30	-3.345	-5.703	4.56		8.03161	24.2786	1.374	18.697	0.0734877	13.6077	9
7	97.407	51.479	27.36			23	1.597	0	5.168		5.40912	24.1904	1.36	19.644	0.0692323	14.4441	10
9	89.879	54.141	27.664			21	-5.931	2.662	5.472		8.4974	23.6057	1.392	11.971	0.116281	8.59986	11
4	88.282	58.931	28.272			35	-7.528	7.452	6.08		12.2135	23.1744	1.512	18.4	0.0821739	12.1693	12
11	88.739	47.297	28.272			24	-7.071	-4.182	6.08		10.2203	22.9764	1.249	14.685	0.0850528	11.7574	13
28	78.549	51.099	28.576			29	-17.261	-0.38	6.384		18.4077	21.7585	1.074	18.483	0.0581075	17.2095	14
8	94.518	54.597	29.184			22	-1.292	3.118	6.992		7.76397	19.0261	1.533	21.987	0.069723	14.3425	15
18	82.579	54.217	29.184			20	-13.231	2.738	6.992		15.2133	18.4077	3.6	22.375	0.160894	6.21528	16
12	87.294	53.304	29.792			28	-8.516	1.825	7.6		11.5591	15.4944	3.125	18.47	0.169193	5.9104	17
13	89.347	58.475	29.792			26	-6.463	6.996	7.6		12.185	15.2133	4.413	19.944	0.22127	4.51937	18
16	92.084	47.905	30.4			18	-3.726	-3.574	8.208		9.69679	14.8297	1.544	22.556	0.0684519	14.6088	19
25	70.565	57.638	30.4			19	-25.245	6.159	8.208		27.251	13.8259	3.052	19.179	0.159132	6.28408	20
14	85.317	49.654	31.008			14	-10.493	-1.825	8.816		13.8259	12.2135	9.793	5.584	1.75376	0.570203	21
24	74.595	54.521	31.008			4	-21.215	3.042	8.816		23.1744	12.185	9.161	6.096	1.50279	0.66543	22
23	75.28	60.376	31.616			13	-20.53	8.897	9.424		24.2786	11.5591	3.773	12.868	0.293208	3.41055	23
26	86.153	58.703	31.92			12	-9.657	7.224	9.728		15.4944	10.6537	4.177	7.723	0.540852	1.84893	24
15	92.465	52.772	32.224			15	-3.345	1.293	10.032		10.6537	10.2203	4.733	15.09	0.313651	3.18825	25
20	79.918	54.445	32.224			11	-15.892	2.966	10.032		19.0261	9.69679	2.908	11.474	0.253443	3.94567	26
19	86.229	54.369	33.136			16	-9.581	2.89	10.944		14.8297	8.67978	13.377	4.254	3.14457	0.318009	27
29	79.082	62.505	33.44			3	-16.728	11.026	11.248		22.9764	8.4974	8.692	3.413	2.54673	0.39266	28
21	74.899	55.281	33.744			9	-20.911	3.802	11.552		24.1904	8.03161	4.727	10.491	0.450577	2.21938	29
22	79.158	57.866	34.656			17	-16.652	6.387	12.464		21.7585	7.76397	7.056	4.008	1.76048	0.568027	30
27	72.39	59.767	35.264			8	-23.42	8.288	13.072		28.0725	7.1153	6.745	6.379	1.05738	0.945738	31
30	77.257	59.92	36.176			10	-18.553	8.441	13.984		24.7187	6.30677	11.971	2.707	4.42224	0.22613	32
31	71.402	64.71	36.48			2	-24.408	13.231	14.288		31.2243	5.5434	13.402	7.215	1.85752	0.538352	33
32	76.572	64.862	38.304			1	-19.238	13.383	16.112		28.4394	5.40912	6.045	3.47	1.74207	0.574028	34
33	73.531	70.945	38.304			7	-22.279	19.466	16.112		33.6879	5.40031	7.187	3.373	2.13074	0.46932	35
34	75.584	68.132	41.344			6	-20.226	16.653	19.152		32.4532	5.19923	7.68	5.406	1.42064	0.703906
35	83.492	55.357	41.952			5	-12.318	3.878	19.76		23.6057

## Sheet: Feuil3
Type	X(micron)	Y(micron)	Z(micron)
36	95.81	51.479	22.192
1	92.313	55.737	22.8
5	94.518	47.069	24.624
2	91.248	54.597	25.232
6	98.092	47.905	25.536
3	91.02	57.334	26.448
10	90.564	49.958	26.752
17	92.465	45.776	26.752
7	97.407	51.479	27.36
9	89.879	54.141	27.664
4	88.282	58.931	28.272
11	88.739	47.297	28.272
28	78.549	51.099	28.576
8	94.518	54.597	29.184
18	82.579	54.217	29.184
12	87.294	53.304	29.792
13	89.347	58.475	29.792
16	92.084	47.905	30.4
25	70.565	57.638	30.4
14	85.317	49.654	31.008
24	74.595	54.521	31.008
23	75.28	60.376	31.616
26	86.153	58.703	31.92
15	92.465	52.772	32.224
20	79.918	54.445	32.224
19	86.229	54.369	33.136
29	79.082	62.505	33.44
21	74.899	55.281	33.744
22	79.158	57.866	34.656
27	72.39	59.767	35.264
30	77.257	59.92	36.176
31	71.402	64.71	36.48
32	76.572	64.862	38.304
33	73.531	70.945	38.304
34	75.584	68.132	41.344
35	83.492	55.357	41.952
