# Supplementary material for: The role of Imp and Syp RNA-binding proteins in precise neuronal elimination by apoptosis through the regulation of transcription factors
Source: eLife journal article supplement (doi:10.7554/elife.91634), 2023-10-11
Supplement: fig7-data1 [file ROIs Protein measurement 04 T3.xlsx]

## Sheet: Feuil1
Syp					Imp					Sorted for distance
	Mean	Min	Max			Mean	Min	Max
1	9.243	1	28		1	3.376	0	18
2	9.645	1	24		2	3.401	0	20
3	5.83	0	19		3	3.11	0	18
4	5.762	0	19		4	7.536	0	29
5	8.383	0	29		5	4.413	0	18
6	5.77	0	18		6	6.235	0	28
7	4.497	0	14		7	9.566	0	33
8	5.483	0	16		8	5.744	0	26
9	6.085	0	19		9	2.494	0	11
10	3.328	0	15		10	6.666	0	31
11	4.586	0	16		11	2.577	0	10
12	2.668	0	10		12	5.02	0	18
13	2.076	0	9		13	9.072	0	30
14	5.462	0	22		14	3.778	0	15
15	2.84	0	14		15	13.882	1	43
16	2.71	0	11		16	14.874	1	43
17	1.067	0	9		17	13.353	2	40
18	1.344	0	7		18	14.97	1	44
19	0.854	0	6		19	13.373	2	38
20	1.824	0	14		20	14.7	1	38
21	1.511	0	13		21	12.948	1	39
22	0.876	0	5		22	13.714	1	37
23	0.96	0	6		23	13.536	1	37
24	0.668	0	5		24	10.769	0	29
25	0.961	0	9		25	13.682	2	37
26	0.759	0	9		26	11.381	1	32
27	0.656	0	5		27	11.468	1	28
28	0.821	0	6		28	9.407	0	29
29	0.886	0	5		29	9.512	1	24
30	0.869	0	5		30	12.39	2	36
31	1.076	0	12		31	13.38	1	35
32	0.847	0	5		32	11.103	1	31
33	1.086	0	6		33	14.639	2	47

## Sheet: Feuil2
Type	X(micron)	Y(micron)	Z(micron)			Type	X(micron)	Y(micron)	Z(micron)		Distance to NB	Distance to NB	Syp mean level	Imp mean level	Syp/Imp	Imp/Syp	helper
34	18.782	34.066	54.72			34	0	0	0		0	28.0521	0.821	9.407	0.0872754	11.458	3
15	27.146	40.605	51.376			28	8.364	6.539	-3.344		11.1309	27.2726	0.847	11.103	0.0762857	13.1086	4
7	27.526	36.271	52.896			32	8.744	2.205	-1.824		9.20036	26.6034	0.886	9.512	0.0931455	10.7359	5
2	15.436	38.704	53.504			29	-3.346	4.638	-1.216		5.84683	25.5529	0.656	11.468	0.0572027	17.4817	6
16	21.823	43.267	53.504			27	3.041	9.201	-1.216		9.76651	22.0564	0.759	11.381	0.0666901	14.9947	7
32	27.603	59.844	53.504			26	8.821	25.778	-1.216		27.2726	21.4084	1.076	13.38	0.0804185	12.4349	8
3	19.77	38.932	53.808			31	0.988	4.866	-0.912		5.04835	19.5919	0.869	12.39	0.0701372	14.2578	9
4	23.42	36.879	53.808			30	4.638	2.813	-0.912		5.50052	19.548	0.96	13.536	0.070922	14.1	10
31	26.614	53.988	54.416			23	7.832	19.922	-0.304		21.4084	17.5055	0.876	13.714	0.0638763	15.6553	11
33	22.66	49.426	54.416			22	3.878	15.36	-0.304		15.8449	16.6079	0.961	13.682	0.0702383	14.2373	12
20	18.25	45.472	54.72			25	-0.532	11.406	0		11.4184	15.9929	0.668	10.769	0.0620299	16.1213	13
19	26.386	45.092	55.024			24	7.604	11.026	0.304		13.3972	15.8449	1.086	14.639	0.0741854	13.4797	14
18	25.549	40.91	55.632			33	6.767	6.844	0.912		9.6677	13.5903	1.067	13.353	0.0799071	12.5145	15
21	13.991	42.582	56.848			17	-4.791	8.516	2.128		10.0002	13.3972	0.854	13.373	0.06386	15.6593	16
30	22.66	53.152	56.848			19	3.878	19.086	2.128		19.5919	12.4929	3.328	6.666	0.49925	2.003	17
1	16.197	36.727	57.152			10	-2.585	2.661	2.432		4.43596	11.4184	1.824	14.7	0.124082	8.05921	18
8	20.379	40.91	57.152			20	1.597	6.844	2.432		7.43676	11.1309	2.84	13.882	0.204581	4.88803	19
5	16.349	40.833	57.76			15	-2.433	6.767	3.04		7.80726	10.9945	2.668	5.02	0.531474	1.88156	20
13	27.831	37.944	58.368			12	9.049	3.878	3.648		10.4991	10.4991	2.076	9.072	0.228836	4.36994	21
22	26.31	49.198	59.28			13	7.528	15.132	4.56		17.5055	10.2781	5.77	6.235	0.925421	1.08059	22
25	18.554	50.034	59.28			6	-0.228	15.968	4.56		16.6079	10.1658	4.586	2.577	1.77959	0.561928	23
29	25.549	59.387	59.28			11	6.767	25.321	4.56		26.6034	10.0002	1.511	12.948	0.116698	8.56916	24
14	25.169	34.37	59.888			21	6.387	0.304	5.168		8.22158	9.76651	2.71	14.874	0.182197	5.48856	25
6	20.151	42.658	60.192			16	1.369	8.592	5.472		10.2781	9.6677	1.344	14.97	0.0897796	11.1384	26
9	20.683	35.967	60.192			18	1.901	1.901	5.472		6.09675	9.20036	4.497	9.566	0.470102	2.1272	27
17	26.234	44.027	60.192			7	7.452	9.961	5.472		13.5903	8.22158	5.462	3.778	1.44574	0.691688	28
23	23.953	52.011	60.496			14	5.171	17.945	5.776		19.548	7.80726	8.383	4.413	1.89961	0.526423	29
24	14.448	48.209	60.8			5	-4.334	14.143	6.08		15.9929	7.43676	5.483	5.744	0.954561	1.0476	30
12	26.614	38.4	61.104			8	7.832	4.334	6.384		10.9945	6.09675	6.085	2.494	2.43986	0.40986	31
26	19.922	55.053	61.408			9	1.14	20.987	6.688		22.0564	5.84683	9.645	3.401	2.83593	0.352618	32
27	26.918	57.258	61.712			2	8.136	23.192	6.992		25.5529	5.50052	5.762	7.536	0.764597	1.30788	33
10	24.485	41.214	63.232			4	5.703	7.148	8.512		12.4929	5.04835	5.83	3.11	1.8746	0.533448	34
28	21.976	60.604	63.232			3	3.194	26.538	8.512		28.0521	4.43596	9.243	3.376	2.73786	0.365249	35
11	21.519	38.324	63.536			1	2.737	4.258	8.816		10.1658
											0
											0

## Sheet: Feuil3
Type	X(micron)	Y(micron)	Z(micron)
15	27.146	40.605	51.376
7	27.526	36.271	52.896
2	15.436	38.704	53.504
16	21.823	43.267	53.504
32	27.603	59.844	53.504
3	19.77	38.932	53.808
4	23.42	36.879	53.808
31	26.614	53.988	54.416
33	22.66	49.426	54.416
20	18.25	45.472	54.72
34	18.782	34.066	54.72
19	26.386	45.092	55.024
18	25.549	40.91	55.632
21	13.991	42.582	56.848
30	22.66	53.152	56.848
1	16.197	36.727	57.152
8	20.379	40.91	57.152
5	16.349	40.833	57.76
13	27.831	37.944	58.368
22	26.31	49.198	59.28
25	18.554	50.034	59.28
29	25.549	59.387	59.28
14	25.169	34.37	59.888
6	20.151	42.658	60.192
9	20.683	35.967	60.192
17	26.234	44.027	60.192
23	23.953	52.011	60.496
24	14.448	48.209	60.8
12	26.614	38.4	61.104
26	19.922	55.053	61.408
27	26.918	57.258	61.712
10	24.485	41.214	63.232
28	21.976	60.604	63.232
11	21.519	38.324	63.536
