# Supplementary material for: The role of Imp and Syp RNA-binding proteins in precise neuronal elimination by apoptosis through the regulation of transcription factors
Source: eLife journal article supplement (doi:10.7554/elife.91634), 2023-10-11
Supplement: fig7-data1 [file Statistics.xlsx]

## Sheet: Feuil1
Syp/Imp	Syp/Imp	Syp/Imp	Syp/Imp	Syp/Imp	Syp/Imp	Syp/Imp	Syp/Imp	Syp/Imp		Average
0.0872754	0.100716	0.100023	0.0527638	0.0780307	0.0535153	0.0938097	0.117647	0.047801		0.0812869
0.0762857	0.0586014	0.0990338	0.0689485	0.0892253	0.0452586	0.0785475	0.0655253	0.0447567		0.0695759
0.0931455	0.0635311	0.0824772	0.0591727	0.113165	0.0524486	0.0722448	0.0734942	0.0470605		0.072971
0.0572027	0.0726613	0.114645	0.0646491	0.0889587	0.0607137	0.076347	0.0870871	0.0437361		0.0740001
0.0666901	0.0632911	0.083779	0.0856497	0.0896229	0.0584967	0.0877746	0.0659559	0.0547892		0.0728943
0.0804185	0.112979	0.0932437	0.0744504	0.151823	0.0441157	0.141028	0.0855297	0.116931		0.100058
0.0701372	0.0732591	0.077152	0.0898047	0.0824205	0.0574713	0.0971907	0.0835955	0.0482443		0.075475
0.070922	0.0734877	0.128959	0.0517021	0.0921702	0.0558706	0.081232	0.0598081	0.0675165		0.0757409
0.0638763	0.0692323	0.141809	0.0681869	0.13402	0.0482688	0.0899348	0.0695381	0.0546083		0.0821638
0.0702383	0.116281	0.0988528	0.0603848	0.15549	0.0946806	0.0779253	0.0786899	0.081457		0.0926667
0.0620299	0.0821739	0.0798014	0.111033	0.109994	0.0625839	0.0958647	0.0956601	0.107531		0.0896302
0.0741854	0.0850528	0.0833119	0.121318	0.0925576	0.766578	0.137633	0.120399	0.0843821		0.173935
0.0799071	0.0581075	0.167363	0.0679507	0.0936082	1.11262	0.283113	0.202077	0.114882		0.242181
0.06386	0.069723	0.209976	0.178492	0.160416	0.0888568	0.0967287	0.985714	0.174894		0.225407
0.49925	0.160894	0.0924796	0.125872	0.135931	0.0679415	0.640224	1.53238	0.210402		0.385042
0.124082	0.169193	0.11979	0.130227	0.227664	0.0751913	0.102672	0.194523	0.343039		0.165153
0.204581	0.22127	0.133199	0.32	0.325635	0.385407	0.13741	0.24599	1.77837		0.416873
0.531474	0.0684519	0.229191	0.748205	0.157623	1.47562	3.93724	0.590675	0.24618		0.887185
0.228836	0.159132	0.750535	0.872578	0.22583	0.173722	0.257999	1.13128	1.47382		0.58597
0.925421	1.75376	0.284699	0.71091	1.03419	0.089172	1.17323	0.83585	0.210062		0.779699
1.77959	1.50279	0.245822	2.31616	0.42388	0.232567	3.8999	3.05204	0.362576		1.53504
0.116698	0.293208	1.23082	2.45462	0.72909	1.37582	4.37403	5.81141	0.543207		1.88099
0.182197	0.540852	0.234896	1.3207	2.00663	0.0616583	1.76602	3.56335	0.245878		1.10246
0.0897796	0.313651	0.456236	3.50581	3.00192	0.600212	6.57254	2.81504	3.21971		2.2861
0.470102	0.253443	1.61829	0.275586	4.52865	2.38342	4.14389	10.3642	3.61202		3.07218
1.44574	3.14457	1.34149	0.281362	5.9745	1.3305	0.113659	4.00033	4.04673		2.40876
1.89961	2.54673	1.27611	3.41246	2.85139	0.23575	0.705324	6.57714	1.94883		2.3837
0.954561	0.450577	1.9894	1.67347	5.57073	0.328836	1.58189	11.2805	0.813479		2.73816
2.43986	1.76048	3.7469	3.25635	5.5612	0.944271	2.08725	7.54862	0.716646		3.11795
2.83593	1.05738	3.35048	7.56284	12.119	0.128215	2.94551	9.02918	6.44621		5.05275
0.764597	4.42224	0.863807	7.61598	6.22093	0.430052	2.67247	2.42033	1.13012		2.94895
1.8746	1.85752	1.97871	1.1064	9.3468	0.621674	9.17137	3.26695	6.7382		3.9958
2.73786	1.74207	3.04454	6.98556		1.42291	0.261188	1.73338	1.73499		2.45781
	2.13074	5.77186			1.6784	0.87978	1.77368	2.4287		2.44386
	1.42064	2.11366			4.28012	14.3698		6.83063		5.80298
		6.5582			3.3826	2.53038				4.15706
					1.61668	15.4942				8.55547
					4.98525					4.98525

## Sheet: Feuil2
Imp/Syp	Imp/Syp	Imp/Syp	Imp/Syp	Imp/Syp	Imp/Syp	Imp/Syp	Imp/Syp	Imp/Syp		Average
11.458	9.92893	9.9977	18.9524	12.8155	18.6862	10.6599	8.5	20.9201		13.5465
13.1086	17.0644	10.0976	14.5036	11.2076	22.0952	12.7311	15.2613	22.343		15.3792
10.7359	15.7403	12.1246	16.8997	8.83669	19.0663	13.8418	13.6065	21.2492		14.6779
17.4817	13.7625	8.72255	15.4681	11.2412	16.4707	13.0981	11.4828	22.8644		14.5102
14.9947	15.8	11.9362	11.6755	11.1579	17.095	11.3928	15.1617	18.2518		14.1628
12.4349	8.85117	10.7246	13.4318	6.58662	22.6677	7.09081	11.6919	8.55206		11.3368
14.2578	13.6502	12.9614	11.1353	12.1329	17.4	10.289	11.9624	20.7278		13.8352
14.1	13.6077	7.7544	19.3416	10.8495	17.8985	12.3104	16.7201	14.8112		14.1548
15.6553	14.4441	7.05174	14.6656	7.46157	20.7173	11.1192	14.3806	18.3122		13.7564
14.2373	8.59986	10.1161	16.5605	6.43127	10.5618	12.8328	12.7081	12.2764		11.5916
16.1213	12.1693	12.5311	9.00636	9.09141	15.9785	10.4314	10.4537	9.29964		11.6759
13.4797	11.7574	12.0031	8.24278	10.8041	1.3045	7.26572	8.30575	11.8509		9.44599
12.5145	17.2095	5.97503	14.7165	10.6828	0.89878	3.53216	4.94862	8.70456		8.79806
15.6593	14.3425	4.76244	5.60248	6.2338	11.2541	10.3382	1.01449	5.71776		8.32499
2.003	6.21528	10.8132	7.94456	7.35667	14.7185	1.56195	0.652579	4.7528		6.22429
8.05921	5.9104	8.34797	7.67889	4.39243	13.2994	9.73979	5.14079	2.91512		7.276
4.88803	4.51937	7.50758	3.125	3.07092	2.59466	7.27747	4.0652	0.562314		4.17895
1.88156	14.6088	4.36317	1.33653	6.34425	0.677679	0.253985	1.69298	4.06207		3.91345
4.36994	6.28408	1.33238	1.14603	4.4281	5.75634	3.87599	0.883955	0.67851		3.19504
1.08059	0.570203	3.51248	1.40665	0.966943	11.2143	0.85235	1.19639	4.7605		2.84004
0.561928	0.66543	4.06799	0.431749	2.35916	4.29983	0.256417	0.327649	2.75804		1.74758
8.56916	3.41055	0.812464	0.407395	1.37157	0.726837	0.228622	0.172075	1.84092		1.94884
5.48856	1.84893	4.2572	0.757175	0.498348	16.2184	0.566245	0.280635	4.06707		3.77584
11.1384	3.18825	2.19185	0.28524	0.333121	1.66608	0.152148	0.355235	0.310587		2.1801
2.1272	3.94567	0.617937	3.62863	0.220816	0.419565	0.241319	0.0964862	0.276854		1.28605
0.691688	0.318009	0.74544	3.55415	0.167378	0.751597	8.79828	0.249979	0.247113		1.72485
0.526423	0.39266	0.783634	0.293044	0.350706	4.24177	1.41779	0.152042	0.513129		0.963467
1.0476	2.21938	0.502664	0.597561	0.17951	3.04103	0.632154	0.0886486	1.22929		1.05976
0.40986	0.568027	0.266887	0.307093	0.179817	1.05902	0.4791	0.132475	1.39539		0.533074
0.352618	0.945738	0.298464	0.132225	0.0825148	7.79941	0.339499	0.110752	0.15513		1.13515
1.30788	0.22613	1.15767	0.131303	0.160748	2.3253	0.374186	0.413167	0.884858		0.775693
0.533448	0.538352	0.50538	0.903833	0.106988	1.60856	0.109035	0.306095	0.148408		0.5289
0.365249	0.574028	0.328456	0.143152		0.702785	3.82866	0.576909	0.576373		0.886952
	0.46932	0.173254			0.595806	1.13665	0.563799	0.411743		0.558428
	0.703906	0.473114			0.233638	0.0695903		0.146399		0.32533
		0.152481			0.295631	0.395198				0.281103
					0.61855	0.0645401				0.341545
					0.200592					0.200592
