# Supplementary material for: The role of Imp and Syp RNA-binding proteins in precise neuronal elimination by apoptosis through the regulation of transcription factors
Source: eLife. 2024 Oct 4;12:RP91634. doi: 10.7554/eLife.91634 (PMC11452180; doi:10.7554/eLife.91634)
Supplement: Figure 4—source data 1. [file elife-91634-fig4-data1.xlsx]

## Sheet: Feuil1
Stage	No. of VNC	Syp count	Imp Count	Volume	Syp/Imp	Normalized to volume	Imp/Syp	Normalized to volume	Syp/Volume	Imp/Volume	Notes		Syp - Imp	Normalised to volume
72h AEL	1	30	1135	462.394	0.0264317	5.71628e-05	37.8333	0.0818206	0.0648798	2.45462	imp gaussian 9, syp 7		-1105	-2.38974
	2	5	1426	355.902	0.00350631	9.85191e-06	285.2	0.801345	0.0140488	4.00672			-1421	-3.99267
	3	4	1330	374.973	0.00300752	8.02064e-06	332.5	0.886732	0.0106674	3.54693			-1326	-3.53626
	4	1	1034	398.534	0.000967118	2.42669e-06	1034	2.59451	0.0025092	2.59451			-1033	-2.592
96h	1	884	15	257.98	58.9333	0.228441	0.0169683	6.57738e-05	3.42662	0.058144	Imp gaussian 9		869	3.36848
	3	997	13	419.12	76.6923	0.182984	0.0130391	3.11107e-05	2.37879	0.0310174			984	2.34778
	4	952	38	573.609	25.0526	0.0436754	0.039916	6.95874e-05	1.65967	0.0662472	Imp gaussian 13		914	1.59342
	5	1128	44	543.546	25.6364	0.047165	0.0390071	7.17641e-05	2.07526	0.0809499			1084	1.99431
	7	999	50	405.787	19.98	0.0492376	0.0500501	0.000123341	2.46188	0.123217	syp gaussian 9		949	2.33866
						#DIV/0!
120h AEL	1	540	6	236.412	90	0.380691	0.0111111	4.69989e-05	2.28415	0.0253794	Syp gaussian 7, Imp 9		534	2.25877
	2	815	7	379.29	116.429	0.306965	0.00858896	2.26448e-05	2.14875	0.0184555			808	2.1303
	3	698	3	327.555	232.667	0.710313	0.00429799	1.31214e-05	2.13094	0.00915877			695	2.12178
	4					#DIV/0!					too close to stack
	5	1016	12	405.705	84.6667	0.20869	0.011811	2.91124e-05	2.50429	0.0295782			1004	2.47471
	6	744	2	284.85	372	1.30595	0.00268817	9.43716e-06	2.6119	0.00702125			742	2.60488
						#DIV/0!
5h APF	1	497	2	140.309	248.5	1.77109	0.00402414	2.86805e-05	3.54217	0.0142542	Syp gaussian 7, Imp 9		495	3.52792
	2	476	3	142.121	158.667	1.11642	0.00630252	4.4346e-05	3.34925	0.0211087			473	3.32814
	3	311	2	160.191	155.5	0.970716	0.00643087	4.0145e-05	1.94143	0.0124851			309	1.92895
	4	352	1	179.418	352	1.96189	0.00284091	1.5834e-05	1.96189	0.00557356			351	1.95632
	5	345	1	192.138	345	1.79559	0.00289855	1.50858e-05	1.79559	0.0052046			344	1.79038
					#DIV/0!	#DIV/0!	#DIV/0!
20h good order	1	80	0	54.6559	#DIV/0!		0						80	1.4637
	2	231	0	65.386	#DIV/0!		0						231	3.53287
	3	290	0	109.302	#DIV/0!		0						290	2.6532
	4	167	0	107.911	#DIV/0!		0						167	1.54758
	5	202	0	81.8242	#DIV/0!		0						202	2.46871
	6	97	0	59.2972	#DIV/0!		0						97	1.63583
	7	76	2	50.7259	38		0.0263158						74	1.45882
