# Supplementary material for: The role of Imp and Syp RNA-binding proteins in precise neuronal elimination by apoptosis through the regulation of transcription factors
Source: eLife. 2024 Oct 4;12:RP91634. doi: 10.7554/eLife.91634 (PMC11452180; doi:10.7554/eLife.91634)
Supplement: Figure 4—source data 2. [file elife-91634-fig4-data2.xlsx]

## Sheet: Feuil1
No. of VNC and NB	Imp					Syp					Imp/Syp	Syp/Imp
EL01A	NB	Mean	Min	Max		NB	Mean	Min	Max
	1	61.358	5	176		1	12.262	2	63		5.00391	0.199844
	2	50.841	4	149		2	8.949	0	66		5.68119	0.176019
	3	44.953	7	127		3	10.916	1	45		4.11808	0.242831
	4	55.228	9	145		4	8.499	0	27		6.49818	0.153889
	5	44.89	8	121		5	15.099	1	100		2.97304	0.336356
	6	46.676	7	132		6	11.874	1	86		3.93094	0.254392
EL02A	NB	Mean	Min	Max		NB	Mean	Min	Max
	1	46.838	12	123		1	4.604	0	18		10.1733	0.0982963
	2	36.133	7	113		2	4.539	0	22		7.96056	0.125619
	3	29.799	3	85		3	3.938	0	16		7.56704	0.132152
	4	24.638	4	83		4	2.664	0	14		9.2485	0.108126
	5	38.477	4	113		5	3.46	0	28		11.1205	0.0899239
EL03A	NB	Mean	Min	Max		NB	Mean	Min	Max
	1	36.936	5	101		1	4.144	0	18		8.91313	0.112194
	2	33.201	6	90		2	3.673	0	16		9.03921	0.110629
	3	34.189	7	74		3	3.244	0	13		10.5391	0.0948843
	4	42.595	4	110		4	3.053	0	11		13.9519	0.0716751
	5	38.688	12	92		5	2.684	0	14		14.4143	0.0693755
ML302B	NB	Mean	Min	Max		NB	Mean	Min	Max
	1	24.667	4	99		1	77.315	23	140		0.319045	3.13435
	2	31.76	10	75		2	112.12	35	179		0.283268	3.53023
	3	23.314	3	57		3	42.241	14	84		0.551928	1.81183
	4	20.453	2	73		4	45.175	14	99		0.45275	2.20872
	5	18.45	3	51		5	32.791	11	82		0.562654	1.77729
	6	25.28	7	59		6	83.203	41	142		0.303835	3.29126
ML303A	NB	Mean	Min	Max		NB	Mean	Min	Max
	1	38.838	2	130		1	27.071	9	53		1.43467	0.697024
	2	46.118	3	155		2	34.632	13	115		1.33166	0.750943
	3	39.512	5	118		3	32.958	12	130		1.19886	0.834126
	4	40.307	8	100		4	32.831	8	68		1.22771	0.814524
	5	30.36	4	78		5	35.707	14	60		0.850253	1.17612
ML3A02	NB	Mean	Min	Max		NB	Mean	Min	Max
	1	27.071	9	53		1	17.978	1	56		1.50578	0.664106
	2	34.632	13	115		2	59.802	7	196		0.579111	1.72678
	3	32.958	12	130		3	46.899	5	136		0.702744	1.42299
	4	32.831	8	68		4	50.979	7	151		0.64401	1.55277
	5	35.707	14	60		5	46.309	8	116		0.77106	1.29692
LL3 01	NB	Mean	Min	Max		NB
	1	8.174	1	31		1	77.965	12	206		0.104842	9.53817
	2	9.195	1	29		2	91.549	21	255		0.100438	9.95639
	3	7.108	1	49		3	56.751	11	149		0.125249	7.9841
	4	5.482	0	44		4	48.038	4	156		0.114118	8.76286
	5	5.864	0	32		5	47.305	8	93		0.123962	8.06702
LL3 zoom 2.5		Mean	Min	Max			Mean	Min	Max
	1	7.746	1	63		1	88.619	16	194		0.0874079	11.4406
	2	4.82	0	28		2	65.108	12	198		0.0740308	13.5079
		Mean	Min	Max
LL3 side mounting 01	1	1.141	0	6		1	10.589	0	28		0.107753	9.28046
	2	2.247	0	14		2	16.568	3	41		0.135623	7.37339
	3	1.558	0	9		3	20.39	3	59		0.07641	13.0873
LL3 side mounting 03		Mean	Min	Max
	1	2.176	0	13		1	14.566	1	51		0.149389	6.69393
	2	1.751	0	9		2	13.583	0	43		0.128911	7.75728
	3	2.214	0	10		3	10.108	1	36		0.219034	4.56549
LL3 side mounting 04		Mean	Min	Max
	1	2.984	0	14		1	13.582	0	36		0.219703	4.55161
	2	3.576	0	43		2	18.489	0	55		0.193412	5.1703
	3	2.334	0	16		3	8.936	0	34		0.261191	3.82862
0702 5h APF slide 1 VNC01	1	50.23	10	132		7	82.89	33	165		0.605984	1.65021
	2	32.291	6	83		8	57.347	17	128		0.563081	1.77594
	3	47.667	11	117		9	90.457	34	166		0.526958	1.89769
	4	35.669	6	124		10	73.723	18	163		0.483825	2.06686
	5	36.613	8	98		11	67.692	28	120		0.540876	1.84885
	6	38.288	9	120		12	46.325	12	119		0.826508	1.20991
VNC 02	1	60.823	24	216		4	53.023	20	113		1.14711	0.871759
	2	50.011	15	118		5	62.425	10	120		0.801137	1.24823
	3	40.72	8	137		6	65.008	28	152		0.626384	1.59646
0701 5h APF Syp 555 VNC01	5	9.892	0	30		1	89.133	20	255		0.153804	6.50178
	6	12.233	0	38		2	86.602	39	169		0.195762	5.10826
	7	8.154	0	30		3	78.743	10	213		0.14351	6.96817
	8	10.116	0	36		4	81.735	16	203		0.171523	5.83011
0701 5h Syp 555 VNC02		Mean	Min	Max
	3	9.574	0	70		1	65.269	28	163		0.271049	3.68937
	4	7.139	0	18		2	54.789	18	111		0.240772	4.15332
0628 20h APF slide 1 VNC01	1	16.41	0	141		1	118.583	25	255		0.138384	7.22626
	2	9.286	0	61		2	41.033	5	115		0.226306	4.4188
0628 20h APF slide 1 VNC02	1	5.542	0	50		1	12.816	0	45		0.432428	2.31252
	2	8.623	0	89		2	13.857	0	61		0.622285	1.60698
	3	7.147	0	62		3	66.303	18	176		0.107793	9.27704
0628 20h Slide 2 VNC 01	1	2.672	0	8		1	50.689	14	116		0.105842	9.44802
0628 20h Slide 2 VNC 03	2	21.853	3	58		1	117.184	36	237		0.204092	4.89974
0702 20h APF slide 1 VNC01	1	13.108	1	41		1	30.767	9	65		0.426041	2.34719
	2	16.772	1	62		2	29.157	4	70		0.575231	1.73843
0702 20h APF slide 1 VNC02	1	25.81	4	62		1	37.352	10	95		0.690994	1.44719
	2	29.028	7	96		2	47.824	16	103		0.606976	1.64751
0702 20h APF slide 1 VNC03	1	47.885	19	101		1	76.891	27	160		0.622765	1.60574
